# Supplementary material
Source: PubMed Central journal article supplement (PMC3058928)
Supplement: NIHMS242694-supplement-1.pdf [file NIHMS242694-supplement-1.pdf]

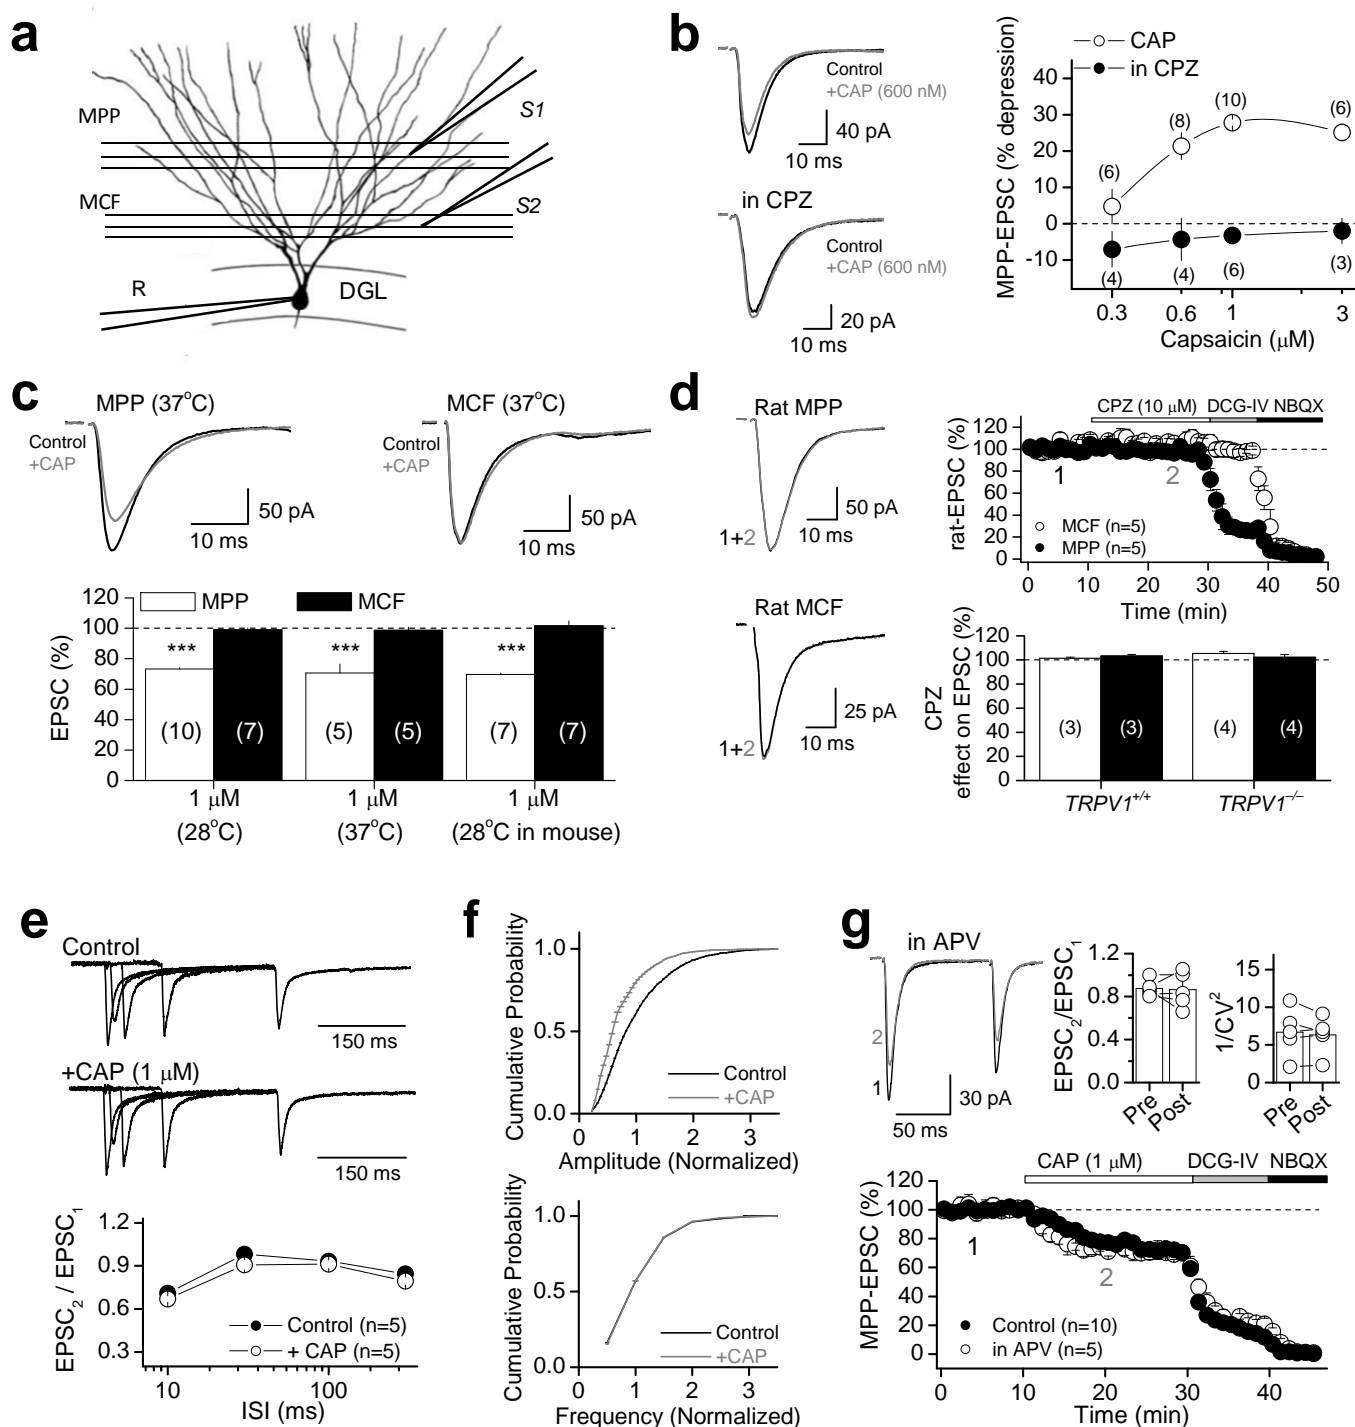

**Supplementary Figure 1. CAP-mediated depression of MPP synaptic inputs.** **a**, Diagram showing the recording configuration used in this study. Two stimulating pipettes, *S1* and *S2*, were placed in the molecular layer to activate medial perforant path (MPP) and mossy cell fibers (MCF), while synaptic evoked responses in dentate granule cell were monitored using a recording pipette (*R*) in the dentate granule cell layer (DGL). **b**, Capsaicin (CAP) suppresses MPP-EPSCs in a concentration-dependent manner (white circles) and the effects are blocked by capsazepine (CPZ, 10  $\mu$ M, black circles). Representative averaged MPP-EPSCs before (*black*) and after (*gray*) 600 nM CAP are shown on the right. **c**, Summary data of CAP-induced effects on synaptic transmission in the dentate gyrus under 28 and 37°C (representative EPSCs recorded at 37°C are shown above). Increasing the recording temperature had no significant effect on CAP-mediated depression. Note that the input-specific nature of CAP-mediated suppression is also observed in mouse. **d**, CPZ had no effect on basal synaptic transmission in rat and mouse, strongly suggesting that TRPV1 receptors are not tonically activated. **e**, CAP-mediated depression did not significantly affect PPR measured at 10, 30, 100 and 300 ms interstimulus intervals (ISI). **f**, Cumulative probability plots of amplitude (*top*) and frequency (*bottom*) of asynchronous MPP-EPSCs evoked in the presence of extracellular strontium before (*black*) and after (*gray*) bath application of 1  $\mu$ M CAP. **g**, CAP-mediated depression was similar in the presence or absence of the NMDAR blocker d-APV (50  $\mu$ M). Number of cells is indicated in parenthesis. \*\*\*  $p < 0.001$ . In panels *d* and *g*, averaged sample traces taken at times indicated by numbers are shown next to each summary plot.

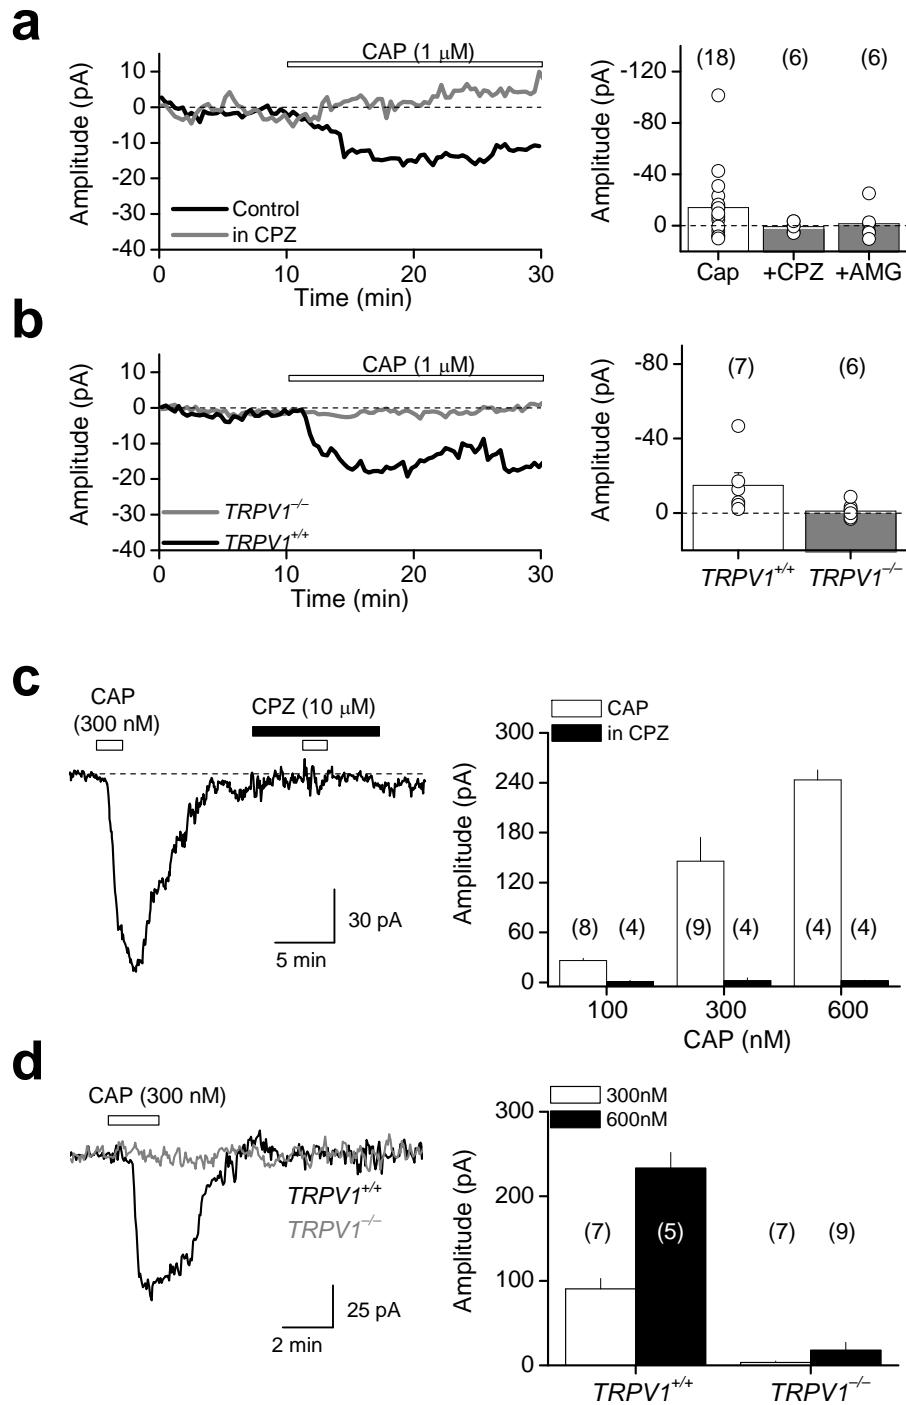

**Supplementary Figure 2. CAP-induced inward current in dentate granule cells.** **a**, Inward current induced in dentate granule cells (DGCs) by bath application of 1  $\mu$ M CAP under control conditions (*black*, averaged traces from 18 cells) or in the presence of 10  $\mu$ M CPZ (*gray*, averaged traces from 6 cells). Summary data are shown on the right. Open circles represent individual experiments. Experiments performed in the presence of 3  $\mu$ M AMG9810 are also included in the bar graph. **b**, CAP-induced inward current in  $TRPV1^{+/+}$  (*black*, averaged traces from 7 cells) but not in  $TRPV1^{-/-}$  mice (*gray*, averaged traces from 6 cells). Summary data are shown on the right. **c**, Dose-dependent, CAP-induced inward currents in rat cultured DGCs. No inward currents were elicited in the presence of CPZ (10  $\mu$ M). **d**, CAP also induced inward currents in cultured DGCs from  $TRPV1^{+/+}$  but not in  $TRPV1^{-/-}$  mice. **c-d**, Representative experiments using 300 nM CAP are shown on the left and summary data (mean  $\pm$  s.e.m.) are shown on the right. Numbers in the summary plots represent number of cells.

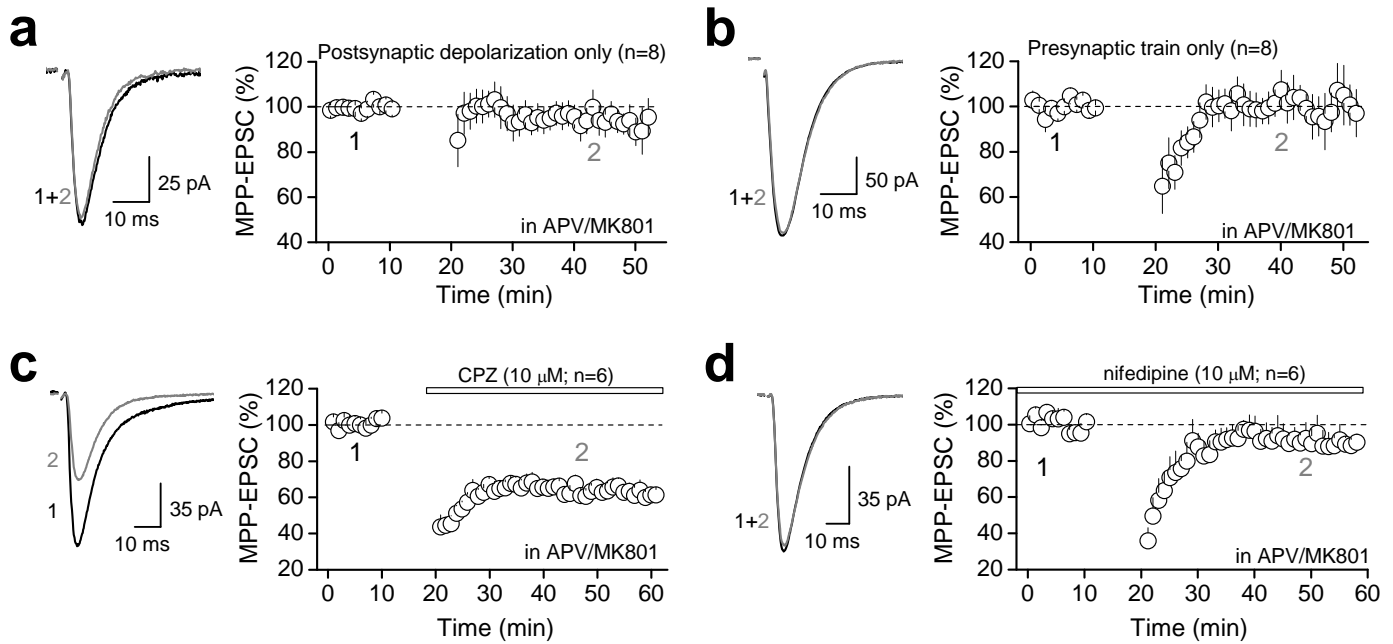

**Supplementary Figure 3. TRPV1-LTD properties.** **a**, Postsynaptic depolarization or **b**, presynaptic stimulation alone were insufficient to induce TRPV1-LTD. **c**, Bath application of CPZ (10  $\mu$ M) immediately after TRPV1-LTD induction did not rescue MPP synaptic transmission. **d**, TRPV1-LTD could not be induced in the presence of the L-type voltage-gated calcium channel blocker nifedipine (10  $\mu$ M). **a-d**, Averaged traces before (black) and after (gray) delivering a 1 Hz induction protocol are shown in the left panel; summary plots (mean  $\pm$  s.e.m) are shown on the right. Number of cells is indicated in parenthesis. In all panels, averaged sample traces taken at times indicated by numbers are shown next to each summary plot.

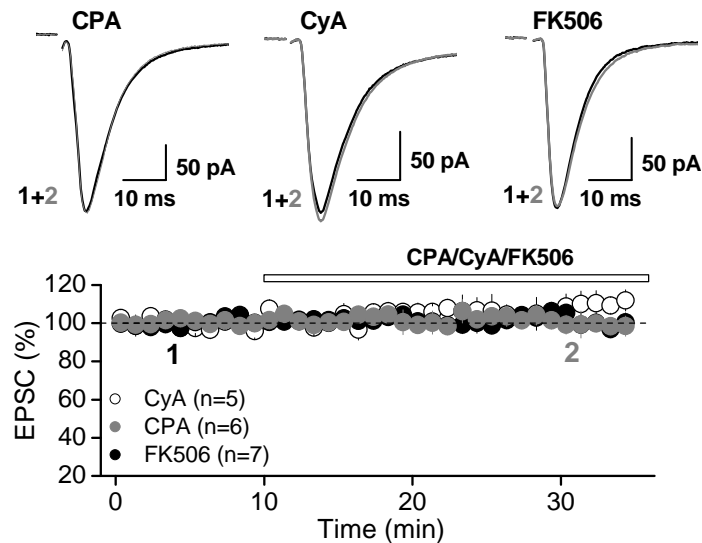

**Supplementary Figure 4. Depletion of internal stores with CPA or blockade of calcineurin with cyclosporine A (CyA) or FK506 had no effect on basal synaptic transmission.** Representative averaged traces before (black) and after 20-25 min (gray) bath application of 30  $\mu$ M CPA, 25  $\mu$ M CyA and 50  $\mu$ M FK506 (Top panel). Summary plot (mean  $\pm$  s.e.m.) showing the effects of CPA, CyA and FK506 on MPP synaptic transmission (Bottom panel). Number of cells is indicated in parenthesis. Averaged sample traces taken at times indicated by numbers are shown next to each summary plot.

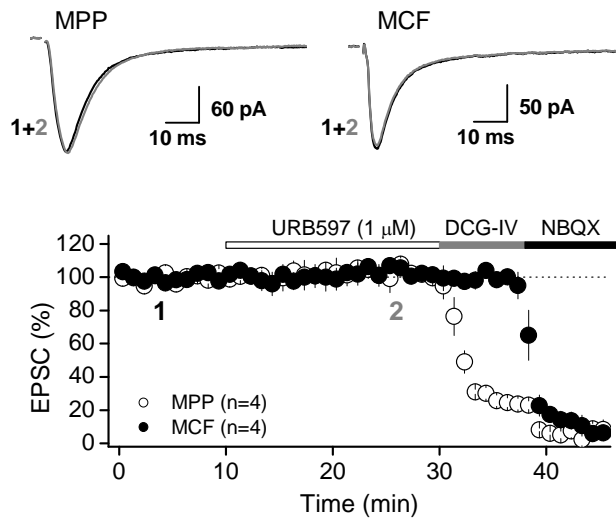

**Supplementary Figure 5. Blocking anandamide degradation with URB597 had no effect on basal synaptic transmission.** Representative averaged traces before (*black*) and after 15-20 min bath application of 1  $\mu$ M URB597 at both MPP- (*top left*) and MCF-mediated EPSCs (*top right*). Summary plot (mean  $\pm$  s.e.m.) showing the effects of URB597, DCG-IV (1  $\mu$ M) and NBQX (10  $\mu$ M) on MPP and MCF synaptic transmission are shown in the bottom panel. Number of cells is indicated in parenthesis. Averaged sample traces taken at times indicated by numbers are shown next to each summary plot.

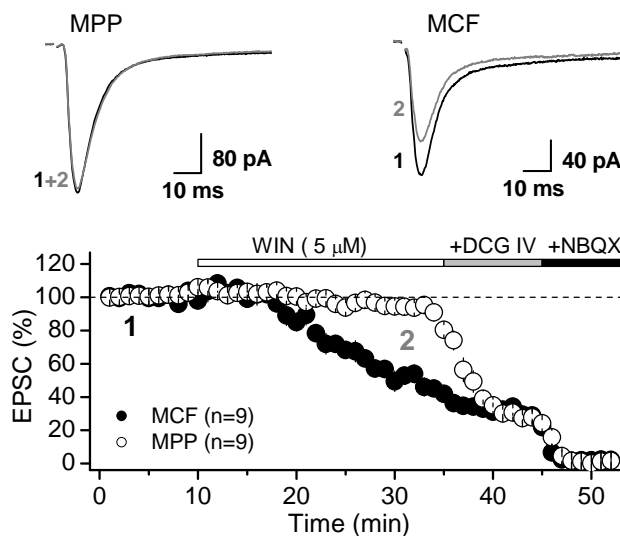

**Supplementary Figure 6. CB1R activation selectively depressed MPP but not MCF synaptic transmission.** Top panel shows representative averaged traces before (*black*) and after (*gray*) 20-25 min bath application of the specific CB1R agonist WIN 52,212 (5  $\mu$ M) on MPP- and MCF-mediated EPSCs in rat dentate gyrus. Bottom panel shows summary data (mean  $\pm$  s.e.m.). Note that in contrast to MCF synapses, MPP synapses are insensitive to bath application of the CB1R agonist WIN. Number of cells is indicated in parenthesis. Averaged sample traces taken at times indicated by numbers are shown next to each summary plot.

## TRPV1-LTD

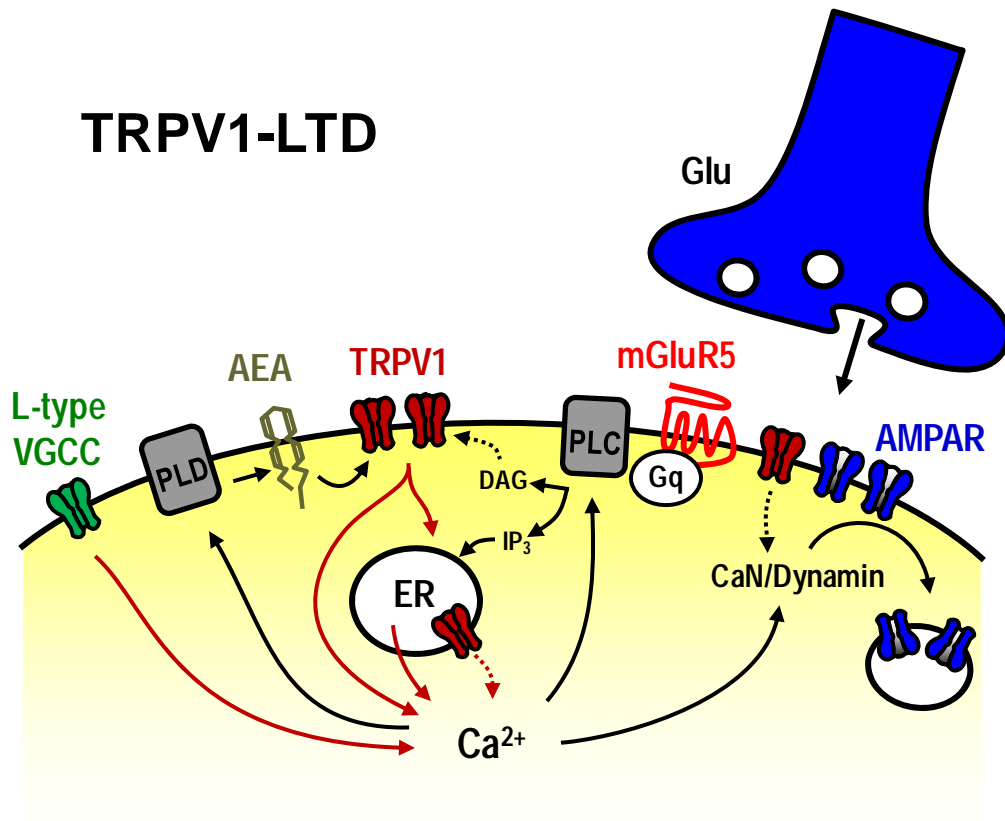

**Supplementary Figure 7. Possible mechanism underlying TRPV1-LTD.** Glutamate release during synaptic stimulation activates Gq-coupled mGluR5 receptors, leading to the activation of phospholipase C (PLC). Coincident activation of mGluR5/PLC and L-type voltage-gated Ca<sup>2+</sup> channels (VGCC) via postsynaptic depolarization increases the activity of the Ca<sup>2+</sup>-regulated enzyme phospholipase D (PLD), which likely triggers the biosynthesis of anandamide (AEA), an endocannabinoid/endovanilloid that activates TRPV1 receptors on the plasma membrane and/or intracellular compartments. In addition, PLC produces IP<sub>3</sub>, which increases Ca<sup>2+</sup> release from the endoplasmic reticulum (ER), and diacylglycerol (DAG), which may directly modulate TRPV1 receptors. Stimulation of Ca<sup>2+</sup>-sensitive phosphatase calcineurin (CaN) resulting from TRPV1 activation promotes a long-lasting, clathrin- and dynamin-dependent endocytosis of AMPA receptors. Solid red lines represent different Ca<sup>2+</sup> sources and solid black lines denote established signal transduction pathways. Dotted lines represent putative pathways involved in TRPV1-LTD.

**Supplementary Table 1:** Effect of bath application of 1  $\mu$ M capsaicin on synaptic currents in dentate granule cells

| Parameter                             | Species                                                                                    | Value %<br>(mean ± s.e.m.) |             | n       | t-test*<br>p-value                                      | Figure                             |
|---------------------------------------|--------------------------------------------------------------------------------------------|----------------------------|-------------|---------|---------------------------------------------------------|------------------------------------|
| MPP-AMPA EPSC                         | Rat MPP<br>in APV<br>at 37°C<br><i>TRPVI</i> <sup>+/+</sup><br><i>TRPVI</i> <sup>-/-</sup> | 74.20 ± 1.27               |             | 10 c    | <0.001 Paired                                           | 1a                                 |
|                                       |                                                                                            | 70.41 ± 3.51               |             | 5 c     | <0.001 Paired                                           | Suppl. 1g                          |
|                                       |                                                                                            | 70.98 ± 3.16               |             | 5c      | <0.001 Paired                                           | Suppl. 1c                          |
|                                       |                                                                                            | 70.02 ± 1.18               |             | 7 c/4 a | <0.001 Paired                                           | 1c                                 |
|                                       |                                                                                            | 103.14 ± 1.44              |             | 6 c/3 a | 0.560 Paired                                            | 1c                                 |
| MCF-AMPA EPSC                         | Rat<br>at 37°C<br><i>TRPVI</i> <sup>+/+</sup>                                              | 99.04 ± 2.56               |             | 7 c     | 0.269 Paired                                            | 1a                                 |
|                                       |                                                                                            | 98.72 ± 1.92               |             | 5 c     | 0.189 Paired                                            | Suppl. 1c                          |
|                                       |                                                                                            | 101.68 ± 3.21              |             | 7 c/4 a | 0.214 Paired                                            | Suppl. 1c                          |
| CAP-mediated depression in CPZ or AMG | Rat CPZ                                                                                    | 104.12 ± 1.16              |             | 6 c     | 0.215 Paired                                            | 1b                                 |
|                                       | Rat AMG                                                                                    | 103.37 ± 1.71              |             | 6 c     | 0.196 Paired                                            | 1b                                 |
| MPP-NMDA EPSC                         | Rat -40 mV                                                                                 | 100.88 ± 1.30              |             | 6 c     | 0.907 Paired                                            | 1d                                 |
|                                       | Rat +40 mV                                                                                 | 100.21 ± 3.43              |             | 6 c     | 0.937 Paired                                            | 1d                                 |
| Asynchronous release                  | Rat MPP Amplitude                                                                          | Control                    | in CAP      | 11c     | 0.004 Paired<br><0.001 K-S<br>0.090 Paired<br>0.562 K-S | 1e<br>Suppl. 1f<br>1e<br>Suppl. 1f |
|                                       |                                                                                            | 9.81 ± 0.91                | 7.54 ± 0.47 |         |                                                         |                                    |
|                                       | Frequency                                                                                  | 4.76 ± 0.38                | 4.45 ± 0.44 | 11c     |                                                         |                                    |
| Glutamate-evoked AMPA current         | Rat MPP                                                                                    | 57.81 ± 4.67               |             | 5 c     | <0.001 Paired                                           | 1f                                 |
|                                       | Rat MCF                                                                                    | 100.80 ± 2.96              |             | 5 c     | 0.615 Paired                                            | 1f                                 |
|                                       | <i>TRPVI</i> <sup>+/+</sup>                                                                | 63.28 ± 6.57               |             | 4 c/2 a | 0.001 Paired                                            | 1g                                 |
|                                       | <i>TRPVI</i> <sup>-/-</sup>                                                                | 98.16 ± 3.37               |             | 4 c/2 a | 0.637 Paired                                            | 1g                                 |
| CPZ after capsaicin                   | Rat in Cap +CPZ                                                                            | 78.85 ± 2.72               |             | 9 c     | -----                                                   | 1h                                 |
|                                       |                                                                                            | 82.35 ± 2.90               |             |         | 0.379 Paired                                            |                                    |
| MPP-AMPA EPSC in BAPTA                | Rat                                                                                        | 99.50 ± 4.85               |             | 6 c     | <0.001 Unpaired                                         | 4a                                 |
| MPP-AMPA EPSC in CPA                  | Rat                                                                                        | 87.02 ± 1.85               |             | 10 c    | <0.001 Unpaired                                         | 4a                                 |
| MPP-AMPA EPSC in FK506                | Rat                                                                                        | 97.08 ± 3.29               |             | 7 c     | <0.001 Unpaired                                         | 4c                                 |
| MPP-AMPA EPSC in CyA                  | Rat                                                                                        | 98.09 ± 1.74               |             | 6 c     | <0.001 Unpaired                                         | 4c                                 |
| MPP-AMPA EPSC in DIP                  | Rat                                                                                        | 104.32 ± 1.68              |             | 10 c    | <0.001 Unpaired                                         | 4e                                 |

The table includes quantitative analyses of experiments shown in Figs. 1, 4 and Supplementary Fig. 1; “n” represents number of cells (c) and animals (a) from *TRPV1*<sup>+/+</sup> and *TRPV1*<sup>-/-</sup> mice.

\* t-test otherwise indicated

**Supplementary Table 2:** Paired pulse ratio (PPR) and coefficient of variation ( $1/CV^2$ ) of MPP-EPSCs during both pharmacological and endogenous activation of TRPV1 receptors

| Parameter                                                  | Species                            | Value %<br>(mean $\pm$ s.e.m.) |                  | n       | Paired<br>t-test<br>p-value | Figure    |
|------------------------------------------------------------|------------------------------------|--------------------------------|------------------|---------|-----------------------------|-----------|
|                                                            |                                    | Pre                            | Post             |         |                             |           |
| Capsaicin 1 $\mu$ M<br>PPR 100 ms                          | Rat (28°C)                         | 0.94 $\pm$ 0.03                | 0.94 $\pm$ 0.03  | 10 c    | 0.932                       | 1a        |
|                                                            | Rat (37°C)                         | 0.92 $\pm$ 0.03                | 0.90 $\pm$ 0.04  | 5 c     | 0.264                       | Suppl. 1c |
|                                                            | Rat in APV                         | 0.88 $\pm$ 0.03                | 0.86 $\pm$ 0.07  | 5 c     | 0.846                       | Suppl. 1g |
|                                                            | <i>TRPV1</i> <sup>+/+</sup>        | 0.99 $\pm$ 0.06                | 1.00 $\pm$ 0.06  | 7 c/4 a | 0.626                       | 1c        |
| Capsaicin 1 $\mu$ M<br>PPR 300ms<br>PPR 30 ms<br>PPR 10 ms | Rat                                | 0.84 $\pm$ 0.03                | 0.79 $\pm$ 0.03  | 5 c     | 0.399                       | Suppl. 1e |
|                                                            |                                    | 0.98 $\pm$ 0.03                | 0.91 $\pm$ 0.04  | 5 c     | 0.262                       | Suppl. 1e |
|                                                            |                                    | 0.71 $\pm$ 0.04                | 0.67 $\pm$ 0.02  | 5 c     | 0.306                       | Suppl. 1e |
| PPR in LTD                                                 | Rat<br><i>TRPV1</i> <sup>+/+</sup> | 0.92 $\pm$ 0.03                | 0.87 $\pm$ 0.03  | 10 c    | 0.096                       | 2a        |
|                                                            |                                    | 0.99 $\pm$ 0.07                | 0.92 $\pm$ 0.04  | 7 c/7a  | 0.108                       | 2b        |
| Bath application<br>AEA PPR                                | Rat<br><i>CB1R</i> <sup>-/-</sup>  | 0.80 $\pm$ 0.02                | 0.79 $\pm$ 0.04  | 6 c     | 0.856                       | 5a        |
|                                                            |                                    | 1.05 $\pm$ 0.13                | 1.05 $\pm$ 0.08  | 7c / 2a | 0.974                       | 5c        |
| Loading AEA PPR                                            | Rat Control<br>in AM251            | 0.97 $\pm$ 0.07                | 0.96 $\pm$ 0.06  | 7 c     | 0.827                       | 5b        |
|                                                            |                                    | 0.95 $\pm$ 0.06                | 0.97 $\pm$ 0.07  | 5 c     | 0.860                       | 5b        |
| Capsaicin 1 $\mu$ M<br>$1/CV^2$                            | Rat (28°C)                         | 10.91 $\pm$ 0.67               | 9.96 $\pm$ 0.56  | 10 c    | 0.056                       | 1a        |
|                                                            | Rat (37°C)                         | 11.32 $\pm$ 0.96               | 8.47 $\pm$ 0.71  | 5 c     | 0.148                       | Suppl. 1c |
|                                                            | Rat in APV                         | 6.70 $\pm$ 1.43                | 6.33 $\pm$ 1.11  | 5c      | 0.454                       | Suppl. 1g |
|                                                            | <i>TRPV1</i> <sup>+/+</sup>        | 7.21 $\pm$ 0.66                | 7.19 $\pm$ 0.55  | 7 c/3 a | 0.946                       | 1c        |
| AEA<br>$1/CV^2$                                            | Rat<br><i>CB1R</i> <sup>-/-</sup>  | 11.44 $\pm$ 1.11               | 11.60 $\pm$ 1.47 | 6 c     | 0.821                       | 5a        |
|                                                            |                                    | 8.02 $\pm$ 1.34                | 7.53 $\pm$ 1.14  | 7c / 2a | 0.209                       | 5c        |
| LTD<br>$1/CV^2$                                            | Rat<br><i>TRPV1</i> <sup>+/+</sup> | 8.08 $\pm$ 0.97                | 7.69 $\pm$ 1.14  | 10 c    | 0.579                       | 2a        |
|                                                            |                                    | 6.96 $\pm$ 1.04                | 6.72 $\pm$ 0.92  | 7 c/7a  | 0.796                       | 2b        |

The table includes quantitative analyses from experiments shown in Figs. 1, 2, 5 and Supplementary Fig. 1; “n” represents number of cells (c) and animals (a) from *TRPV1*<sup>+/+</sup> and *TRPV1*<sup>-/-</sup> mice.

**Supplementary Table 3:** TRPV1 activation and long-term synaptic plasticity

| Parameter                        | Species                     | Value %<br>(mean $\pm$ s.e.m.) | n        | t-test<br>p-value | Figure    |
|----------------------------------|-----------------------------|--------------------------------|----------|-------------------|-----------|
| MPP-LTD in<br>APV/MK801          | Rat 1Hz                     | 70.19 $\pm$ 4.78               | 10 c     | <0.001 Paired     | 2a        |
|                                  | in CPZ                      | 106.22 $\pm$ 12.07             | 6 c      | 0.643 Paired      | 2a        |
|                                  | in AMG                      | 100.08 $\pm$ 1.77              | 5 c      | 0.813 Paired      | 2a        |
|                                  | <i>TRPV1</i> <sup>+/+</sup> | 72.94 $\pm$ 4.33               | 7 c/7 a  | <0.001 Paired     | 2b        |
|                                  | <i>TRPV1</i> <sup>-/-</sup> | 102.77 $\pm$ 2.77              | 10 c/8 a | 0.521 Paired      | 2b        |
| MPP-LTP<br>without<br>APV/MK801  | Rat 1 Hz                    | 184.99 $\pm$ 12.50             | 8 c      | <0.001 Paired     | 2e        |
|                                  | in CPZ                      | 263.21 $\pm$ 25.42             | 7 c      | 0.001 Unpaired    | 2e        |
|                                  | in AMG                      | 267.02 $\pm$ 8.64              | 6 c      | <0.001 Unpaired   | 2e        |
|                                  | <i>TRPV1</i> <sup>+/+</sup> | 149.46 $\pm$ 9.41              | 7 c/ 4 a | 0.002 Paired      | 2f        |
|                                  | <i>TRPV1</i> <sup>-/-</sup> | 199.69 $\pm$ 8.15              | 8 c/4 a  | 0.001 Unpaired    | 2f        |
| MCF-AMPA<br>EPSC in<br>APV/MK801 | Rat 1 Hz                    | 123.65 $\pm$ 6.06              | 10 c     | 0.004 Paired      | 2c        |
| MPP-LTD<br>in APVMK801           | Rat 1 HZ                    |                                |          |                   |           |
|                                  | Paired                      | 64.87 $\pm$ 2.59               | 8 c      | <0.001 Paired     | 2c        |
|                                  | Unpaired                    | 96.95 $\pm$ 3.90               | 7 c      | <0.001 Unpaired   | 2c        |
|                                  | Presynaptic Burst           | 96.53 $\pm$ 6.71               | 8 c      | 0.520 Paired      | Suppl. 3b |
|                                  | Depolarization              | 99.31 $\pm$ 5.74               | 8 c      | 0.979 Paired      | Suppl. 3a |
| MPP-LTD<br>in APV/MK801          | Rat 1 Hz                    |                                |          |                   |           |
|                                  | Incubated in CAP            | 99.28 $\pm$ 3.74               | 6 c      | 0.658 Paired      | 2d        |
|                                  | CAP after induction         | 63.78 $\pm$ 2.99               | 6 c      | 0.103 Paired      | 2d        |
|                                  | CPZ after induction         | 63.83 $\pm$ 3.70               | 6 c      | <0.001 Paired     | Suppl. 3c |

The table includes quantitative analyses from experiments shown in Figs. 2 and Supplementary Fig. 3; “n” represents number of cells (c) and animals (a) from *TRPV1*<sup>+/+</sup> and *TRPV1*<sup>-/-</sup> mice.

**Supplementary Table 4:** Role of group I mGluR and calcium in TRPV1-LTD

| Parameter                    | Species                              | Value %<br>(mean $\pm$ s.e.m.)        | n           | t-test<br>p-value                 | Figure    |
|------------------------------|--------------------------------------|---------------------------------------|-------------|-----------------------------------|-----------|
| LTD in mGluR antagonists     | Rat 1 Hz<br>MPEP<br>LY367385         | 103.99 $\pm$ 5.06<br>68.87 $\pm$ 1.59 | 10 c<br>6 c | <0.001 Unpaired<br>0.204 Unpaired | 3a<br>3a  |
| LTD in U73122                | Rat 1 Hz                             | 99.46 $\pm$ 4.23                      | 7 c         | <0.001 Unpaired                   | 3b        |
| LTD in GDP $\beta$ S         | Rat 1 Hz                             | 100.08 $\pm$ 2.17                     | 7 c         | <0.001 Unpaired                   | 3b        |
| LTD in BAPTA                 | Rat 1 Hz                             | 106.85 $\pm$ 7.29                     | 6 c         | <0.001 Unpaired                   | 4b        |
| LTD in CPA                   | Rat 1 Hz                             | 98.77 $\pm$ 1.35                      | 7 c         | <0.001 Unpaired                   | 4b        |
| LTD in FK506                 | Rat 1 Hz                             | 98.37 $\pm$ 3.32                      | 7 c         | <0.001 Unpaired                   | 4d        |
| LTD in CyA                   | Rat 1 Hz                             | 103.05 $\pm$ 2.40                     | 7 c         | <0.001 Unpaired                   | 4d        |
| LTD in DIP                   | Rat DIP<br>Rat DIP scrambled         | 107.46 $\pm$ 4.73<br>70.92 $\pm$ 3.66 | 10 c<br>5c  | <0.001 Unpaired<br>0.632 Unpaired | 4f<br>4f  |
| LTD in THL                   | Rat 1 Hz<br>Rat CA1-iLTD             | 65.36 $\pm$ 5.26<br>97.04 $\pm$ 3.33  | 6 c<br>6c   | 0.002 Unpaired<br>0.428 Unpaired  | 5f<br>5f  |
| MPP-AMPA EPSC                | Rat<br>DHPG<br>DHPG in MK801         | 92.11 $\pm$ 4.76<br>94.80 $\pm$ 3.54  | 6 c<br>5 c  | 0.089 Paired<br>0.144 Paired      | 3c<br>3c  |
| MPP-AMPA EPSC in APV/MK801   | Rat 1 Hz<br>DHPG+Dep<br>DHPG+Dep+CPZ | 63.80 $\pm$ 2.63<br>101.83 $\pm$ 2.87 | 6 c<br>8 c  | <0.001 Paired<br><0.001 Unpaired  | 3d<br>3d  |
| MPP-EPSC Nifedipine baseline | Rat                                  | 101.16 $\pm$ 2.35                     | 4 c         | 0.893 Paired                      | -----     |
| LTD in Nifedipine            | Rat 1 Hz                             | 91.75 $\pm$ 7.29                      | 6 c         | 0.331 Paired                      | Suppl. 3d |

The table includes quantitative analyses from experiments shown in Figs. 3-5 and Supplementary Fig. 3.

**Supplementary Table 5:** Effect of anandamide on MPP AMPAR-EPSCs

| Parameter                                | Species                             | Value %<br>(mean $\pm$ s.e.m.) | n*        | t-test<br>p-value | Figure   |
|------------------------------------------|-------------------------------------|--------------------------------|-----------|-------------------|----------|
| AMPA EPSC<br>(Bath application)          | Rat MPP                             | 69.06 $\pm$ 3.09               | 6 c       | <0.001 Paired     | 5a       |
|                                          | Rat MCF                             | 102.82 $\pm$ 1.19              | 6 c       | 0.433 Paired      | 5a       |
|                                          | <i>TRPV1</i> <sup>-/-</sup>         | 96.47 $\pm$ 3.72               | 7 c / 3 a | 0.323 Paired      | 5c       |
|                                          | <i>CB1R</i> <sup>-/-</sup>          | 74.11 $\pm$ 1.43               | 8 c / 2 a | <0.001 Paired     | 5c       |
| AMPA EPSC<br>(URB597 effect on baseline) | Rat URB MPP                         | 102.60 $\pm$ 1.96              | 4 c       | 0.279 Paired      | Suppl. 5 |
|                                          | Rat URB MCF                         | 102.51 $\pm$ 2.30              | 4 c       | 0.361 Paired      | Suppl. 5 |
| AMPA EPSC<br>(Loading DGCs)              | Rat MPP                             | 73.56 $\pm$ 3.50               | 7 c       | <0.001 Paired     | 5b       |
|                                          | in AM251                            | 68.76 $\pm$ 3.38               | 5 c       | 0.207 Unpaired    | 5b       |
|                                          | in CPZ                              | 102.81 $\pm$ 2.47              | 7 c       | <0.001 Unpaired   | 5b       |
| Sub-threshold<br>1Hz pairing protocol    | Rat Control                         | 96.41 $\pm$ 3.21               | 7 c       | -----             | 5d       |
|                                          | Rat URB                             | 69.11 $\pm$ 5.11               | 8 c       | <0.001 Paired     | 5d       |
|                                          | Rat URB+CPZ                         | 100.04 $\pm$ 1.22              | 7 c       | 0.321 Paired      | 5d       |
|                                          | <i>TRPV1</i> <sup>+/+</sup> Control | 97.52 $\pm$ 2.01               | 7 c / 3a  | -----             | 5e       |
|                                          | <i>TRPV1</i> <sup>+/+</sup> in URB  | 56.43 $\pm$ 7.44               | 5 c / 2a  | <0.001 Unpaired   | 5e       |
|                                          | <i>TRPV1</i> <sup>-/-</sup> in URB  | 97.06 $\pm$ 3.33               | 7 c / 2a  | 0.404 Unpaired    | 5e       |

The table includes quantitative analyses from experiments shown in Fig. 5 and Supplementary Fig. 5; “n” represents number of cells (c) and animals (a) from *TRPV1*<sup>+/+</sup> and *TRPV1*<sup>-/-</sup> mice.
